# Supplementary material for: GraphClust2: Annotation and discovery of structured RNAs with scalable and accessible integrative clustering
Source: PubMed Central journal article supplement (PMC6897289; doi:10.1093/gigascience/giz150), 2019-12-06
Supplement: giz150_response_to_reviewer_comments_revision_1.pdf [file giz150_response_to_reviewer_comments_revision_1.pdf]

## Author's Response To Reviewer Comments

Close

We would like to thank the reviewers for their feedback and the constructive reviewing process.

Close
